# Supplementary material
Source: publisher figshare collection journal article supplement (https://acs.figshare.com/ndownloader/files/6570873)
Supplement: Supplementary file 1 [file 6570873]

66
2tPr
C       4.606647    6.431629    2.318399
P       4.605201    4.577385    4.996677
C       5.120729    7.573735    5.058574
H       5.781963    8.285873    5.188668
H       4.861139    7.206470    5.929515
H       4.329402    7.939508    4.610780
I       7.227103    4.202804    2.259104
Pt      5.961299    6.039879    3.866372
C       3.446790    5.770252    1.918533
H       3.162700    4.987946    2.375914
C       2.710978    6.259939    0.847660
F       1.586674    5.588112    0.494902
C       3.059755    7.384131    0.135571
H       2.512488    7.709594   -0.571041
C       4.235224    8.024606    0.482030
H       4.515872    8.790490   -0.005478
C       5.012141    7.554327    1.544686
C       6.295086    8.181366    1.900731
N       6.929246    7.564778    2.925045
C       6.893283    9.281670    1.298194
H       6.482484    9.713133    0.558716
C       8.101959    9.737020    1.804873
H       8.526791   10.483495    1.399530
C       8.696590    9.124910    2.878485
H       9.517573    9.456345    3.224944
C       8.091963    8.015649    3.459112
C       8.541014    7.227371    4.616257
C       9.758978    7.509539    5.255768
H      10.289357    8.242577    4.965455
C      10.185965    6.724247    6.304731
H      10.995754    6.916837    6.763481
C       9.402755    5.652309    6.664884
F       9.828182    4.853580    7.672491
C       8.205425    5.347747    6.066455
H       7.708006    4.592314    6.358138
C       7.712070    6.147968    5.022970
C       5.096159    4.241471    6.723768
H       5.911334    3.678629    6.710074
H       5.338525    5.101410    7.149653
C       4.052410    3.551728    7.598817
H       3.315213    4.183246    7.790533
H       3.673711    2.776887    7.109940
C       4.663517    3.072491    8.906596
H       5.389129    2.442466    8.717619
H       3.974802    2.629085    9.444772
H       5.019048    3.841360    9.400951
C       2.918115    5.302958    5.165388
H       2.883787    5.783688    6.029481
H       2.809639    5.979265    4.450559
C       1.708009    4.365386    5.105134
H       1.639042    3.966768    4.201328
H       1.821035    3.632347    5.759709
C       0.431664    5.141720    5.421466
H       0.375674    5.928504    4.839470
H       0.446749    5.428366    6.358138
H      -0.346465    4.565441    5.268093
C       4.425836    2.929168    4.239671
H       3.552178    2.549959    4.510813
H       4.414630    3.032181    3.255071
C       5.530980    1.937849    4.617627
H       6.409602    2.388720    4.558742
H       5.401147    1.645231    5.555668
C       5.529875    0.713630    3.704235
H       5.684449    0.997291    2.778518
H       4.662539    0.261266    3.765858
H       6.240309    0.098535    3.980854


76
2cBu
Pt      2.964881    3.962006    8.847796
I       5.614224    3.891671    8.278320
C       3.333287    5.701833    9.897071
H       4.166117    5.607219   10.404863
H       2.592417    5.873209   10.515536
H       3.416318    6.449819    9.270468
C       2.657091    4.709278    6.918673
C       2.620332    6.019593    6.443431
H       2.691607    6.753298    7.043993
C       2.476107    6.239169    5.074670
F       2.446074    7.531632    4.645813
C       2.353715    5.248400    4.148600
H       2.250504    5.448339    3.225784
C       2.385035    3.941655    4.601056
H       2.301696    3.225802    3.984218
C       2.538830    3.670310    5.964934
C       2.573381    2.286803    6.469472
N       2.746226    2.218431    7.811216
C       2.479409    1.096094    5.763119
H       2.340740    1.106805    4.822401
C       2.591949   -0.112466    6.440176
H       2.525007   -0.928288    5.958424
C       2.799564   -0.141028    7.808937
H       2.893908   -0.967562    8.266276
C       2.868834    1.063961    8.503897
C       3.139268    1.256760    9.934504
C       3.256139    0.180302   10.811748
H       3.133983   -0.705142   10.492751
C       3.548904    0.399878   12.149586
H       3.623410   -0.321331   12.761541
C       3.726026    1.695912   12.553216
F       4.012329    1.911917   13.868269
C       3.614429    2.788436   11.728053
H       3.752249    3.663169   12.069837
C       3.293118    2.597422   10.375568
P       0.782105    4.193007    9.471144
C      -0.326622    2.947316    8.765931
H       0.095726    2.058301    8.873348
H      -1.164786    2.941960    9.291626
C      -0.682817    3.136544    7.293007
H       0.108682    3.472156    6.803117
H      -1.401714    3.811338    7.213257
C      -1.152026    1.810162    6.668031
H      -0.439182    1.130013    6.773822
H      -1.954158    1.487047    7.149783
C      -1.473090    1.958331    5.230914
H      -0.679015    2.268951    4.747534
H      -2.197058    2.609919    5.123496
H      -1.756546    1.092524    4.867972
C       0.100264    5.810728    8.975883
H       0.723375    6.515871    9.281861
H       0.075700    5.846432    7.986339
C      -1.289895    6.142770    9.499951
H      -1.892804    5.378717    9.319294
H      -1.244146    6.265947   10.479730
C      -1.875170    7.394174    8.868466
H      -1.235534    8.140375    8.982393
H      -1.992204    7.240650    7.898452
C      -3.197236    7.786912    9.465773
H      -3.554550    8.563460    8.984021
H      -3.074148    8.017198   10.409746
H      -3.825503    7.038925    9.390906
C       0.514275    4.032699   11.282107
H       1.305432    4.405800   11.745956
H      -0.264174    4.591457   11.531121
C       0.273217    2.618844   11.807803
H      -0.608981    2.297514   11.493688
H       0.967091    2.011887   11.446489
C       0.314009    2.584926   13.327925
H       1.199764    2.902686   13.635530
H      -0.371195    3.206165   13.682729
C       0.062439    1.196064   13.884544
H      -0.787531    0.855096   13.536250
H       0.021403    1.238908   14.862695
H       0.790461    0.599817   13.612745
I       3.460309    6.220425   10.219324

66
Me6Pr
Pt      9.710553    5.785460    7.873432
I       9.233260    5.324002   10.499082
P      11.143637    4.072621    7.792211
C       9.143671    5.772794    5.939655
C       9.464155    4.878863    4.926680
H      10.174675    4.258958    5.042709
C       8.732150    4.897132    3.729884
F       9.091352    4.010508    2.770361
C       7.672795    5.741129    3.512166
H       7.189601    5.719207    2.694747
C       7.332090    6.616791    4.506889
H       6.599762    7.206249    4.377823
C       8.043207    6.661853    5.710203
C       7.755365    7.638600    6.757074
N       8.597399    7.578923    7.818285
C       6.773696    8.629961    6.690585
H       6.154575    8.644576    5.969640
C       6.709683    9.576261    7.668360
H       6.013409   10.221742    7.657930
C       7.657885    9.600619    8.680031
H       7.660731   10.297251    9.325362
C       8.608228    8.581246    8.730875
C       9.765189    8.654319    9.672146
C      11.041055    8.543491    9.099822
H      11.127660    8.387602    8.166373
C      12.184444    8.659191    9.893775
H      13.052691    8.587335    9.514398
C      12.016547    8.879629   11.235282
F      13.111556    8.974624   12.018805
C      10.771610    8.956356   11.824554
H      10.698487    9.067184   12.764521
C       9.630462    8.872321   11.051460
C       8.287809    8.928344   11.718954
H       7.627260    8.466764   11.162274
H       8.020076    9.863683   11.836287
H       8.340687    8.491122   12.595040
C      12.215165    3.943525    9.284947
H      11.653497    3.668282   10.051522
H      12.882008    3.227406    9.132414
C      12.954557    5.213783    9.661716
H      12.334045    5.983489    9.605657
H      13.691215    5.367237    9.020296
C      13.526404    5.123659   11.085356
H      14.077903    4.316199   11.164882
H      12.791992    5.082251   11.730687
H      14.077872    5.914069   11.266570
C      12.383648    4.115247    6.440275
H      13.181365    3.604951    6.727089
H      12.004616    3.658539    5.647626
C      12.822794    5.512166    6.030913
H      13.074648    6.024897    6.840511
H      12.063987    5.978617    5.599389
C      14.003860    5.481718    5.070087
H      13.799447    4.887389    4.319156
H      14.799275    5.152888    5.539419
H      14.175024    6.386610    4.733733
C      10.344009    2.443085    7.703560
H       9.675273    2.391934    8.432328
H       9.848267    2.394370    6.848333
C      11.229298    1.214235    7.798730
H      11.822621    1.292180    8.587468
H      11.798514    1.152123    6.990436
C      10.375273   -0.048716    7.922581
H       9.851230   -0.170504    7.103858
H       9.769320    0.040190    8.687853
H      10.958615   -0.825729    8.055559


75
Me6Bu
C      13.016590    5.983180    7.078357
I      12.751508    5.330447    2.549669
P      10.950598    4.193889    5.430435
Pt     12.398944    5.879767    5.172104
C      12.746334    5.138641    8.164627
H      12.015361    4.531705    8.124202
C      13.537120    5.186654    9.287410
C      14.886265    6.890506    8.395443
H      15.613273    7.498673    8.469774
C      14.119353    6.873270    7.227018
F      13.265305    4.309736   10.294524
C      14.603098    6.037349    9.443895
H      15.122151    6.039811   10.239363
C      14.411708    7.768285    6.110756
N      13.541409    7.665118    5.072866
C      15.445010    8.703926    6.069026
H      16.073026    8.756864    6.781035
C      15.547642    9.547235    4.994493
H      16.285596   10.140628    4.924075
C      14.570846    9.533693    4.011243
H      14.599146   10.160326    3.297930
C      13.550439    8.591896    4.079053
C      12.367287    8.673149    3.184478
C      12.462946    8.843042    1.798278
C      13.770098    8.830731    1.054973
H      14.068688    9.751599    0.901095
H      13.652352    8.377683    0.194303
H      14.443354    8.354292    1.584415
C      11.284846    8.946455    1.068013
H      11.318722    9.063410    0.126492
C      10.077175    8.881206    1.705691
F       8.939653    8.999392    0.958212
C       9.947600    8.721162    3.050162
H       9.091676    8.684229    3.462240
C      11.116930    8.615287    3.799988
H      11.062951    8.502025    4.741508
C       9.882653    3.890298    3.976034
H      10.462508    3.641615    3.213167
H       9.305080    3.112238    4.174249
C       8.992216    5.043845    3.537875
H       9.500006    5.890847    3.606989
H       8.214854    5.102939    4.146864
C       8.494618    4.871490    2.104729
H       9.267247    4.940432    1.490524
H       8.114526    3.962933    2.006926
C       7.439131    5.889616    1.679610
H       7.242175    5.776354    0.726353
H       7.778554    6.795711    1.836096
H       6.623251    5.751732    2.202532
C       9.720626    4.379048    6.775819
H       8.925638    3.837361    6.546307
H      10.107022    4.002329    7.605192
C       9.263841    5.799745    7.065317
H       8.871650    6.187544    6.242464
H      10.049582    6.347588    7.315694
C       8.222577    5.861300    8.198532
H       8.661464    5.595381    9.044857
H       7.922006    6.799404    8.298944
C       7.010419    4.982290    7.979453
H       6.610630    5.186654    7.109654
H       6.354276    5.148489    8.688853
H       7.282307    4.040493    8.001621
C      11.608570    2.528694    5.776920
H      12.109687    2.561934    6.629766
H      10.845680    1.910678    5.904717
C      12.517217    1.953767    4.708907
H      13.379601    2.438823    4.723252
H      12.103286    2.096575    3.820852
C      12.782024    0.453047    4.904514
H      11.915387   -0.024622    4.933203
H      13.289347    0.113262    4.125999
C      13.551680    0.145271    6.161614
H      14.409116    0.616785    6.143357
H      13.710177   -0.821148    6.218992
H      13.034905    0.438274    6.941433


64
Me1Pr
Pt     -0.452051    3.454466   15.825299
C      -1.940269    2.258345   15.015805
P      -0.322494    2.691664   17.916603
C      -2.885308    1.385991   15.571946
H      -2.887934    1.235681   16.509594
C      -3.804413    0.750630   14.784751
F      -4.657998   -0.127257   15.408327
C      -3.919031    0.937827   13.425295
H      -4.573203    0.473063   12.914828
C      -3.048876    1.825857   12.836914
H      -3.113965    2.003832   11.904640
C      -2.058637    2.473206   13.605302
C      -1.140746    3.429476   13.000801
N      -0.376470    4.086047   13.900836
C      -0.970927    3.707043   11.644032
H      -1.500808    3.263489   10.991171
C      -0.029441    4.627349   11.267899
H       0.093813    4.821922   10.346370
C       0.735514    5.270087   12.202860
H       1.387597    5.901760   11.923446
C       0.567659    5.008197   13.554256
C       1.261167    5.591918   14.736391
C       2.141446    6.701264   14.661164
C       2.669523    7.196459   15.832553
H       3.288043    7.916658   15.805686
F       2.814689    7.198303   18.177748
C       2.311095    6.662534   17.030808
C       1.483756    5.576241   17.132902
H       1.288952    5.221213   17.992636
C       0.916023    4.971311   15.999126
C       2.614798    7.361523   13.339322
H       3.092176    6.700342   12.796614
H       3.212595    8.110309   13.543509
H       1.836664    7.691653   12.842288
C      -1.019762    1.036497   18.387577
H      -0.809112    0.869587   19.341345
H      -2.004966    1.077993   18.304290
C      -0.527293   -0.130945   17.584262
H       0.438943   -0.264657   17.756209
H      -0.644353    0.059940   16.619747
C      -1.294494   -1.414578   17.949650
H      -2.218641   -1.344495   17.632622
H      -1.291461   -1.530769   18.922224
H      -0.861819   -2.185495   17.527842
C      -1.191890    3.783581   19.104918
H      -1.151361    3.383368   20.007640
H      -0.735450    4.661468   19.137158
C      -2.660423    3.988299   18.701917
H      -2.690617    4.335027   17.775016
H      -3.116669    3.109490   18.707291
C      -3.420891    4.934425   19.599266
H      -4.366137    4.938113   19.344032
H      -3.053754    5.838132   19.507919
H      -3.335876    4.640259   20.531540
C       1.402588    2.515625   18.583704
H       1.694435    3.383368   18.959838
H       1.398423    1.853522   19.319852
C       2.399326    2.072993   17.525155
H       2.427968    2.748007   16.802441
H       2.098914    1.216316   17.130215
C       3.798527    1.895940   18.102790
H       4.412012    1.612840   17.390822
H       3.778255    1.214472   18.806698
H       4.106313    2.746163   18.478924


69
Me26Pr
Pt      0.634612    7.551059   11.834597
I      -1.212850    6.553234   13.551695
P       1.787835    5.634280   12.028927
C       1.256882    8.134771   10.014266
C       1.982692    7.433742    9.046055
H       2.456119    6.647376    9.292726
C       2.018189    7.868516    7.741885
C       1.368839    8.980245    7.294545
H       1.414619    9.247038    6.384108
C       0.646785    9.697982    8.217841
H       0.180598   10.477701    7.939838
F       2.722375    7.111794    6.852819
C       0.583429    9.303631    9.560949
C      -0.139430   10.078320   10.554153
N      -0.152558    9.532516   11.803989
C      -0.715432   11.321559   10.313096
H      -0.738099   11.670636    9.430369
C      -1.251153   12.043068   11.351578
H      -1.680234   12.876146   11.190753
C      -1.155504   11.537508   12.633470
H      -1.470310   12.049716   13.369499
C      -0.601926   10.287083   12.847723
C      -0.381225    9.854824   14.255849
C      -1.469890    9.689358   15.124087
C      -2.903666    9.715229   14.656644
H      -3.064360   10.533395   14.141025
H      -3.500939    9.696185   15.434147
H      -3.077243    8.932636   14.092126
C      -1.234295    9.439094   16.473172
H      -1.957228    9.300936   17.073187
C       0.059949    9.394179   16.919244
F       0.268744    9.194758   18.256375
C       1.144064    9.548686   16.102441
H       2.026229    9.489578   16.451982
C       0.933347    9.794459   14.745931
C       2.120250   10.033405   13.851431
H       2.272322    9.243445   13.291622
H       2.913964   10.202823   14.400012
H       1.946787   10.810070   13.278944
C       0.993041    4.176348   11.267000
H       1.495348    3.366806   11.536672
H       0.076244    4.092627   11.630849
C       0.908586    4.210304    9.745499
H       0.383845    5.003498    9.470213
H       1.820930    4.310015    9.376036
C       0.272617    2.972455    9.153090
H       0.273515    3.039827    8.175280
H      -0.650062    2.894303    9.473835
H       0.782366    2.181058    9.424935
C       3.525622    5.610026   11.443944
H       3.538382    5.894605   10.495292
H       4.036403    6.282668   11.960468
C       4.245718    4.287198   11.549349
H       3.643851    3.568024   11.232408
H       4.453601    4.108797   12.500174
C       5.529215    4.243182   10.747578
H       5.324824    4.362116    9.796210
H       5.968256    3.377585   10.882867
H       6.124792    4.962176   11.045865
C       2.014057    5.112191   13.767216
H       1.130076    4.870550   14.142837
H       2.578171    4.299235   13.782429
C       2.651311    6.163375   14.665518
H       3.518043    6.444361   14.276858
H       2.064137    6.959982   14.706087
C       2.877938    5.630507   16.074188
H       3.483288    4.861567   16.039052
H       2.020845    5.355629   16.461037
H       3.276972    6.334769   16.629469
